# Supplementary material for: A simple physical model for the simultaneous rationalisation of melting points and heat capacities of ionic liquids
Source: Royal Society of Chemistry journal article supplement (doi:10.1039/c0cp00881h), 2010-01-01
Supplement: c0cp00881h.pdf [file c0cp00881h.pdf]

## Supplementary data

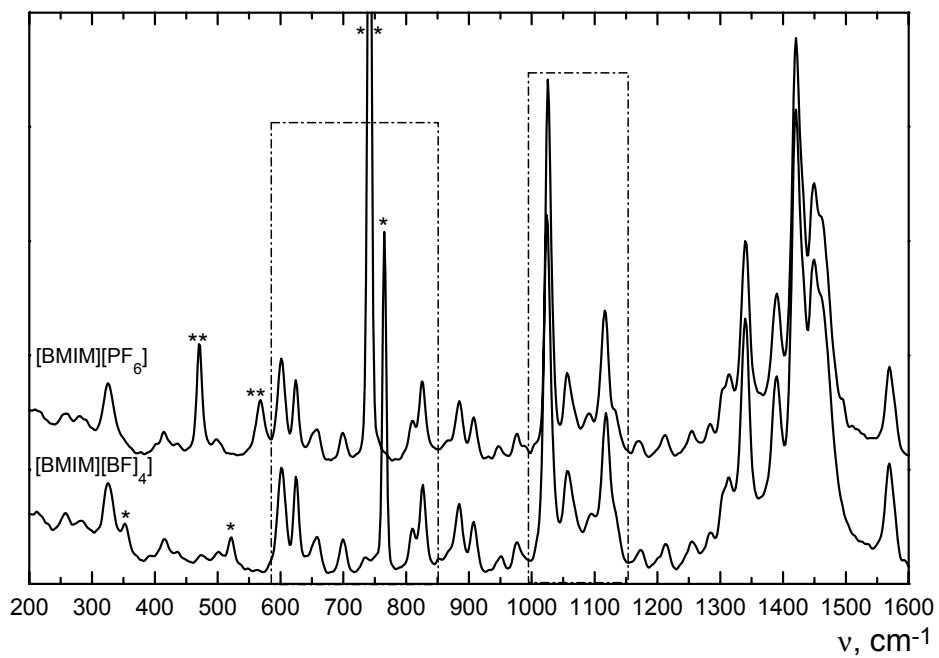

**Figure 1S.** Raman spectra of [BMIM][BF<sub>4</sub>] and [BMIM][PF<sub>6</sub>]. BF<sub>4</sub><sup>-</sup> bands are marked with \*, and PF<sub>6</sub><sup>-</sup> bands – with \*\*. Dot-dash borders mark conformationally sensitive regions, discussed in Ref. 39.

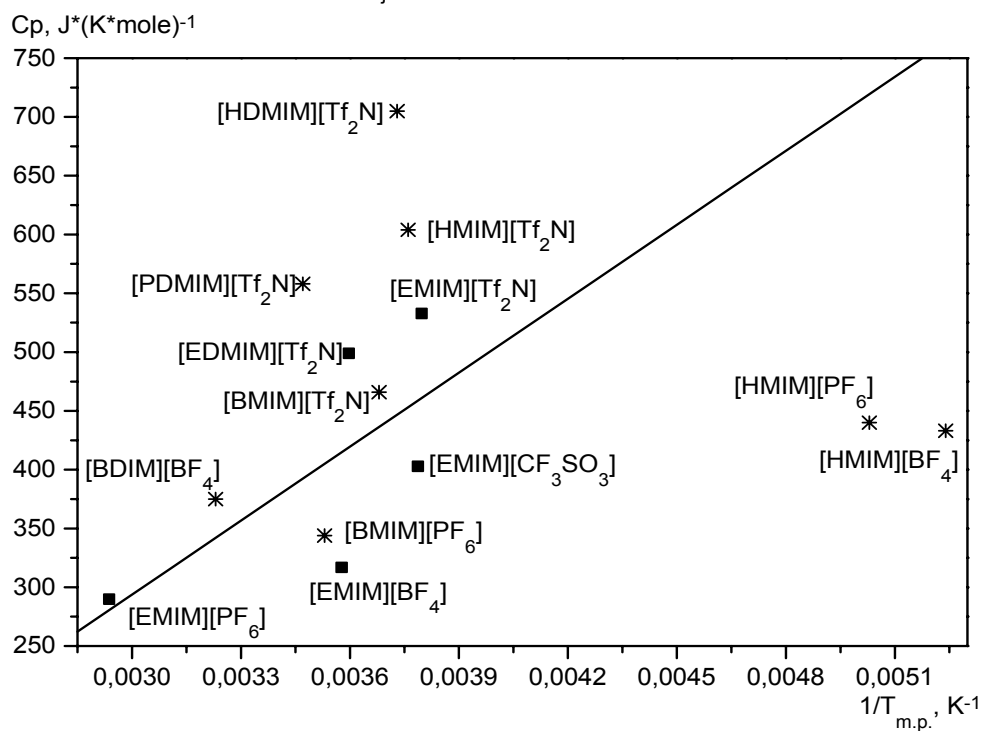

**Figure 2S.** Experimental heat capacities ( $C_p$ , measured at 323 K) vs. reciprocal melting point ( $1/T_{m.p.}$ ) of some ionic liquids. <sup>Error! Bookmark not defined.</sup> Black squares correspond to less conformationally flexible [EMIM] cations and asterisks to more conformationally flexible cations with alkyl chains longer than ethyl.
